# Supplementary material for: Harnessing the genomic diversity of Pseudomonas strains against lettuce bacterial pathogens
Source: Front Microbiol. 2022 Dec 22;13:1038888. doi: 10.3389/fmicb.2022.1038888 (PMC9814014; doi:10.3389/fmicb.2022.1038888)
Supplement: Supplementary file 2 [file Table_2.XLSX]

## Sheet: Genomic features
Table S2. Genomic features of the 35 strains under study.
	Taxonomy					PacBio sequencing						Flye assembly				PGAP annotation				Accession numbers
Strains	Group/Subgroup	Species name	in silico DNA-DNA hybridization (TYGS/GGDC)	Average nucleotide identity (ANIb)	TETRA (Tetra-nucleotide signature correlation index)	# nucleotides (Gb)	depth (x)	# raw reads	average read length (pb)	# reads >= 10kb	% reads >= 10kb	Genome size (Mb)	GC (%)	coverage (x)	# contigs	# CDSs	# pseudogenes	# rRNA	# tRNA	GenBank	SRA
B21-045	P. fluorescens group / P. koreensis subgroup	P. atacamensis	Pseudomonas atacamensis M7D1 - 73.4%			0.964579	160.974	151509	6366.48	33206	0.219168	5.99213	0.599	139	1	5310	66	16	70	CP087171	SRR16962386
B21-050	P. fluorescens group / P. koreensis subgroup	P. atacamensis	Pseudomonas atacamensis M7D1 - 73.3%			1.41227	237.743	217640	6489.03	53618	0.246361	5.94034	0.601	216	1	5260	55	16	70	CP087167	SRR16962381
B21-026	P. fluorescens group / P. koreensis subgroup	P. atacamensis	Pseudomonas atacamensis M7D1 - 71.5%			1.22222	204.732	318410	3838.51	25247	0.0792909	5.96986	0.601	181	1	5301	77	16	68	CP087187	SRR16962403
B21-063	P. fluorescens group / P. koreensis subgroup	P. siliginis	Pseudomonas siliginis SWRI31 - 68.7 %	Pseudomonas siliginis SWRI31 - 95.74%	Pseudomonas siliginis SWRI31 - 0.99867	0.589751	98.5347	106884	5517.67	17084	0.159837	5.98521	0.6	83	1	5213	74	16	69	CP087186	SRR16962402
B21-039	P. fluorescens group / P. koreensis subgroup	P. moraviensis	Pseudomonas moraviensis LMG 24280 - 88.9%			2.00432	330.929	563748	3555.35	41585	0.0737652	6.05666	0.6	300	1	5259	94	16	69	CP087177	SRR16962392
B21-041	P. fluorescens group / P. koreensis subgroup	Pseudomonas sp.	Pseudomonas zeae OE 48.2 - 63.6%			1.43986	224.468	395852	3637.36	35577	0.0898745	6.41452	0.592	198	1	5634	76	19	74	CP087175	SRR16962390
B21-051	P. fluorescens group / P. koreensis subgroup	Pseudomonas sp.	Pseudomonas koreensis LMG 21318 - 44.4%			1.55561	257.282	296017	5255.15	43215	0.145988	6.04633	0.603	233	1	5358	51	19	71	CP087166	SRR16962380
B21-021	P. fluorescens group / P. koreensis subgroup	Pseudomonas sp.	Pseudomonas gozinkensis LMG 31526 - 57.0%			0.874132	134.605	162482	5379.87	29335	0.180543	6.49407	0.606	123	1	5773	56	19	74	CP087192	SRR16962374
B21-015	P. fluorescens group / P. mandelii subgroup	Pseudomonas sp.	Pseudomonas farris SWRI79 - 46.3 %			1.9714	299.097	321364	6134.48	68434	0.212949	6.59118	0.59	280	1	5930	218	19	69	CP087196	SRR16962385
B21-048	P. fluorescens group / P. mandelii subgroup	Pseudomonas sp.	Pseudomonas farris SWRI79 - 52.3%			6.71896	1175.7	2043359	3288.2	35490	0.0173685	5.71488	0.585	923	1	5261	223	19	71	CP087168	SRR16962382
B21-017	P. fluorescens group / P. mandelii subgroup	Pseudomonas sp.	Pseudomonas farris SWRI79 - 43.4%			1.21218	185.048	210462	5759.6	40232	0.19116	6.55059	0.592	173	1	5882	86	19	67	CP087194	SRR16962377
B21-019	P. fluorescens group / P. mandelii subgroup	Pseudomonas sp.	Pseudomonas farris SWRI79 - 43.4%			1.04292	162.626	170924	6101.68	35567	0.208087	6.41301	0.594	151	1	5692	68	19	69	CP087193	SRR16962376
B21-025	P. fluorescens group / P. jessenii subgroup	P. laurylsulfatiphila	Pseudomonas laurylsulfatiphila AP3 16 - 68.1%	Pseudomonas laurylsulfatiphila AP3 16 - 95.56%	Pseudomonas laurylsulfatiphila AP3 16 - 0.99871	0.53807	81.6501	86072	6251.39	16801	0.195197	6.58995	0.602	70	1	5853	116	19	70	CP087188	SRR16962404
B21-016	P. fluorescens group / P. corrugata subgroup	P. brassicacearum	Pseudomonas brassicacearum LMG 21623 - 96.15%			1.57572	232.264	299273	5265.14	47196	0.157702	6.78416	0.608	216	1	5954	71	16	66	CP087195	SRR16962378
B21-010	P. fluorescens group / P. corrugata subgroup	Pseudomonas sp.	Pseudomonas brassicacearum LMG 21623 - 63.9%			1.14144	176.348	202474	5637.47	37206	0.183757	6.47265	0.608	163	1	5692	68	16	65	CP087198	SRR16962407
B21-020	P. fluorescens group / P. corrugata subgroup	P. canavaninivorans	Pseudomonas canavaninivorans HB002 - 89.4%			2.09613	324.03	323904	6471.44	60983	0.188275	6.46892	0.608	292	1	5768	80	16	65	CP102179	SRR16962375
B21-028	P. fluorescens group / P. corrugata subgroup	Pseudomonas sp.	Pseudomonas mediterranea CFBP 5447 - 54.6%			1.47012	226.383	275143	5343.11	45272	0.16454	6.49393	0.607	205	1	5583	113	16	65	CP087184	SRR16962400
B21-046	P. fluorescens group / P. fluorescens subgroup	P. rhodesiae	Pseudomonas rhodesiae LMG 17764 - 81.6%			0.992962	172.574	208594	4760.26	25556	0.122516	5.75384	0.605	148	1	5157	81	16	67	CP087170	SRR16962384
B21-024	P. fluorescens group / P. protegens subgroup	P. protegens	Pseudomonas protegens CHA0 - 89.6%			0.881255	127.376	155811	5655.92	27307	0.175257	6.91853	0.634	112	1	6221	69	16	70	CP087189	SRR16962405
B21-030	P. fluorescens group / P. protegens subgroup	P. protegens	Pseudomonas protegens CHA0 - 91.6%			1.34703	190.645	241226	5584.12	41819	0.17336	7.06567	0.633	172	1	6392	82	16	70	CP087182	SRR16962398
B21-009	P. putida group	Pseudomonas sp.	Pseudomonas wadenswilerensis CCOS 864 - 47.9%			0.819635	138.986	191537	4279.25	17016	0.0888392	5.89726	0.628	119	1	5369	48	19	74	CP087199	SRR16962408
B21-035	P. putida group	Pseudomonas sp.	Pseudomonas wadenswilerensis CCOS 864 - 47.6%			1.4336	244.684	317357	4517.32	41065	0.129397	5.85899	0.628	221	1	5277	63	19	74	CP087179	SRR16962394
B21-032	P. putida group	Pseudomonas sp.	Pseudomonas wadenswilerensis CCOS 864 - 47.8%			1.08461	183.281	178909	6062.35	35912	0.200728	5.91775	0.627	167	1	5387	55	19	74	CP087180	SRR16962395
B21-012	P. putida group	Pseudomonas sp.	Pseudomonas wadenswilerensis CCOS 864 - 47.8%			0.928655	156.451	160800	5775.22	29623	0.184223	5.93576	0.627	143	1	5374	46	19	74	CP087197	SRR16962396
B21-042	P. putida group	P. donghuensis	Pseudomonas donghuensis HYS - 95.3%			1.16645	209.084	290968	4008.87	23066	0.0792733	5.57889	0.624	184	1	5072	84	20	73	CP087174	SRR16962389
B21-043	P. putida group	P. donghuensis	Pseudomonas donghuensis HYS - 94.9%			1.32139	228.774	241539	5470.71	37531	0.155383	5.77595	0.623	198	1	5312	77	19	76	CP087173	SRR16962388
B21-022	P. putida group	P. wadenswilerensis	Pseudomonas wadenswilerensis CCOS 864 - 94.9%			0.998275	171.314	170464	5856.22	32141	0.18855	5.82716	0.625	159	1	5265	56	19	74	CP087191	SRR16962373
B21-036	P. putida group	"P. qingdaonensis"	Pseudomonas qingdaonensis JJ3 - 92.3%			0.792739	139.935	208486	3802.36	14741	0.070705	5.66505	0.643	119	1	5081	57	19	70	CP087178	SRR16962393
B21-023	P. putida group	Pseudomonas sp.	Pseudomonas soli LMG 27941 - 60.5%			1.06735	181.689	184282	5791.94	34793	0.188803	5.8746	0.64	163	1	5178	70	22	78	CP087190	SRR16962406
B21-044	P. putida group	Pseudomonas sp.	Pseudomonas soli LMG 27941 - 60.5%			1.18889	207.566	219035	5427.86	32502	0.148387	5.72778	0.642	182	1	5049	72	22	78	CP087172	SRR16962387
B21-027	P. putida group	P. sichuanensis	Pseudomonas sichuanensis WCHPs060039 - 68.5%	Pseudomonas sichuanensis WCHPs060039 - 95.66%	Pseudomonas sichuanensis WCHPs060039 - 0.99937	1.27582	212.842	216379	5896.23	41771	0.193046	5.99422	0.636	194	1	5279	93	22	76	CP087185	SRR16962401
B21-052	P. putida group	P. sichuanensis	Pseudomonas sichuanensis WCHPs060039 - 68.4%	Pseudomonas sichuanensis WCHPs060039 - 95.79%	Pseudomonas sichuanensis WCHPs060039 - 0.99944	1.26009	214.558	205370	6135.69	42455	0.206724	5.87294	0.639	194	1	5317	105	22	76	CP087165	SRR16962379
B21-031	P. putida group	P. kermanshahensis	Pseudomonas kermanshahensis - 74.90%			1.28717	215.425	218405	5893.49	42006	0.192331	5.97501	0.624	197	1	5235	80	22	71	CP087181	SRR16962397
B21-047	P. putida group	'P. capeferrum''	Pseudomonas capeferrum WCS358 - 89.5%			1.09802	185.109	206455	5318.46	31239	0.151311	5.93177	0.626	161	1	5265	97	22	76	CP087169	SRR16962383
B21-029	P. putida group	P. putida	Pseudomonas putida NBRC 14164 -69.0%	Pseudomonas putida NBRC 14164 - 95.50%	Pseudomonas putida NBRC 14164 - 0.99947	1.54207	242.971	251268	6137.14	53577	0.213227	6.34672	0.625	223	1	5581	89	22	78	CP087183	SRR16962399

## Sheet: Atelier
		P. corrugata subgroup	Type strain	Genbank
		corrugata	BS3649	LT629798.1
		viciae	11K1	CP035088
		mediterranea	DSM 16733	LT629790.1
		thivervalensis	BS3779	LT629691.1
		kilonensis	BS3780	FNTT01000001-FNTT01000002
		brassicacearum	LMG 21623	LT629713.1
		ogarae	F113	CP003150.1
		P. putida group
		donghuensis
		alkylphenolica
		quingdoensis
		donghuensis
		P. mandelii group
		migulae
		lini
		silesiensis
		prosekii
		mandelii
		arsenicoxydas
		frederiksbergensis
